# Supplementary material
Source: PubMed Central journal article supplement (PMC2633773)
Supplement: NIHMS87458-supplement-1.pdf [file NIHMS87458-supplement-1.pdf]

# Genetic Effect on Blood Pressure is Modulated by Age: The HyperGEN Study --- Supplemental Materials

Short Title: Gene-age Interactions in BP

Gang Shi,<sup>1</sup> Chi C. Gu,<sup>1</sup> Aldi T. Kraja,<sup>2</sup> Donna K. Arnett,<sup>3</sup> Richard H. Myers,<sup>4</sup> James S. Pankow,<sup>5</sup>  
Steven C. Hunt,<sup>6</sup> Dabeeru C. Rao<sup>1,7</sup>

<sup>1</sup>Division of Biostatistics, Washington University School of Medicine, Saint Louis, MO, 63110, USA; <sup>2</sup>Division of Statistical Genomics, Washington University School of Medicine, Saint Louis, MO, 63110, USA; <sup>3</sup>Department of Epidemiology, School of Public Health, University of Alabama at Birmingham, Birmingham, AL, 35294, USA; <sup>4</sup>Department of Neurology, Boston University School of Medicine, MA, 02118, USA; <sup>5</sup>Division of Epidemiology and Community Health, University of Minnesota, Minneapolis, MN, 55454, USA; <sup>6</sup>Cardiovascular Genetics Division, University of Utah School of Medicine, Salt Lake City, UT, 84108, USA; <sup>7</sup>Also Departments of Genetics and Psychiatry, Washington University School of Medicine, Saint Louis, MO, 63110, USA.

## **Address for Correspondence:**

Dr. Gang Shi  
Division of Biostatistics  
Washington University School of Medicine  
Campus Box 8067  
660 South Euclid Avenue  
St. Louis, MO 63110-1093

Email: [gang@wubios.wustl.edu](mailto:gang@wubios.wustl.edu)

Phone: (314) 362-3643

Fax: (314) 362-2693

## Statistical Analysis

In the traditional variance components approach,<sup>1</sup> the variance covariance matrix ( $\mathbf{\Omega}$ ) among the relatives in a pedigree is typically decomposed as

$$\mathbf{\Omega} = \hat{\mathbf{\Pi}}\sigma_g^2 + 2\mathbf{\Phi}\sigma_a^2 + \mathbf{I}\sigma_e^2$$

where  $\hat{\mathbf{\Pi}}$  is an  $n \times n$  matrix whose elements  $\hat{\pi}_{ij}$  are estimated allele-sharing proportion between the  $i$ th and  $j$ th individuals in the pedigree and  $\sigma_g^2$  represents the additive variance due to the QTL.  $\mathbf{\Phi} = (\phi_{ij})_{n \times n}$  is a matrix whose elements are kinship coefficients for the pairs of individuals in the pedigree, and  $\mathbf{I}$  is an identity matrix of dimension  $n \times n$ .  $\sigma_a^2$  is the additive polygenic variance, and  $\sigma_e^2$  is the residual environmental variance. We recently generalized the variance components model to include gene-age interactions in the QTL and polygenic effects,<sup>2</sup> i.e., to expand the variance covariance matrices  $\hat{\mathbf{\Pi}}\sigma_g^2$  and  $2\mathbf{\Phi}\sigma_a^2$  as functions of the ages of the relatives in the pedigree. The variance covariance matrix may be expressed as:

$$\mathbf{\Omega} = \hat{\mathbf{\Pi}} \circ \mathbf{T}(age)\sigma_g^2 + 2\mathbf{\Phi} \circ \mathbf{H}(age)\sigma_a^2 + \mathbf{I}\sigma_e^2$$

where  $\mathbf{T}(age)$ , and  $\mathbf{H}(age)$  are age trend matrices consisting of normalized age trend functions, and “ $\circ$ ” represents element-wise matrix product. We used Gaussian age trend functions and  $\sigma_g^2$  will represent the maximum variance (maximum over ages) explained by the QTL effect and  $\sigma_a^2$  denotes the maximum polygenic variance. Note that linear<sup>3,4</sup> and exponential<sup>3</sup> functions were proposed to model gene-age interactions, which are applicable to monotonic age trend only. The unimodal Gaussian function used in this study is inspired by prior work in cross-sectional<sup>5</sup> and longitudinal<sup>6</sup> data which clearly and consistently demonstrated non-monotonic age trends in genetic effects. To test for linkage, we tested on peak QTL variance  $\sigma_g^2$ . Under the null

hypothesis  $\sigma^2_g = 0$ , i.e., there is no linkage between QTL and marker, and under the alternative hypothesis there is a tight linkage  $\sigma^2_g > 0$ . Since  $\sigma^2_g$  is constrained to be nonnegative and the null hypothesis is on the boundary, test statistic follows an asymptotic distribution of  $(1/2)\chi^2_2 + (1/2)\chi^2_3$ .<sup>7</sup> We computed multi-point IBDs at each marker location by the Genehunter<sup>8</sup> software and conducted likelihood ratio tests using the *QTLtrends* package.<sup>2</sup>

## Reference

1. Amos CI. Robust variance-components approach for accessing genetic linkage in pedigrees. *Am J Hum Genet.* 1994;54:535-543.
2. Shi G, Rao DC. Ignoring temporal trends in genetic effects substantially reduces power of quantitative trait linkage analysis. *Genet Epidemiol.* 2008;32:61-72.
3. Almasy L, Towne B, Peterson C, Blangero J. Detecting Genotype×age interaction. *Genet Epidemiol.* 2001;21(Suppl 1):S819-824.
4. Shete SS, Chen J, Zhou X, Amos CI. Modeling age×major gene interaction by a variance component approach. *Genet Epidemiol.* 2001;21(Suppl 1):S849-853.
5. Province MA, Rao DC. A new model for the resolution of cultural and biological inheritance in the presence of temporal trends: Application to systolic blood pressure. *Genet Epidemiol.* 1985;2:363-374.
6. Province MA, Tishler P, Rao DC. Repeated-measures model for the investigation of temporal trends using longitudinal family studies: Application to systolic blood pressure. *Genet Epidemiol.* 1989;6:333-347.
7. Self SG, Liang KY. Asymptotic properties of maximum likelihood estimators and likelihood ratio tests under nonstandard conditions. *J Am Stat Assoc.* 1987;82:605-610.

8. Kruglyak L, Daly MJ, Reeve-Daly MP, Lander ES. Parametric and nonparametric linkage analysis: a unified multipoint approach. *Am J Hum Genet.* 1996;58:1347-1363.

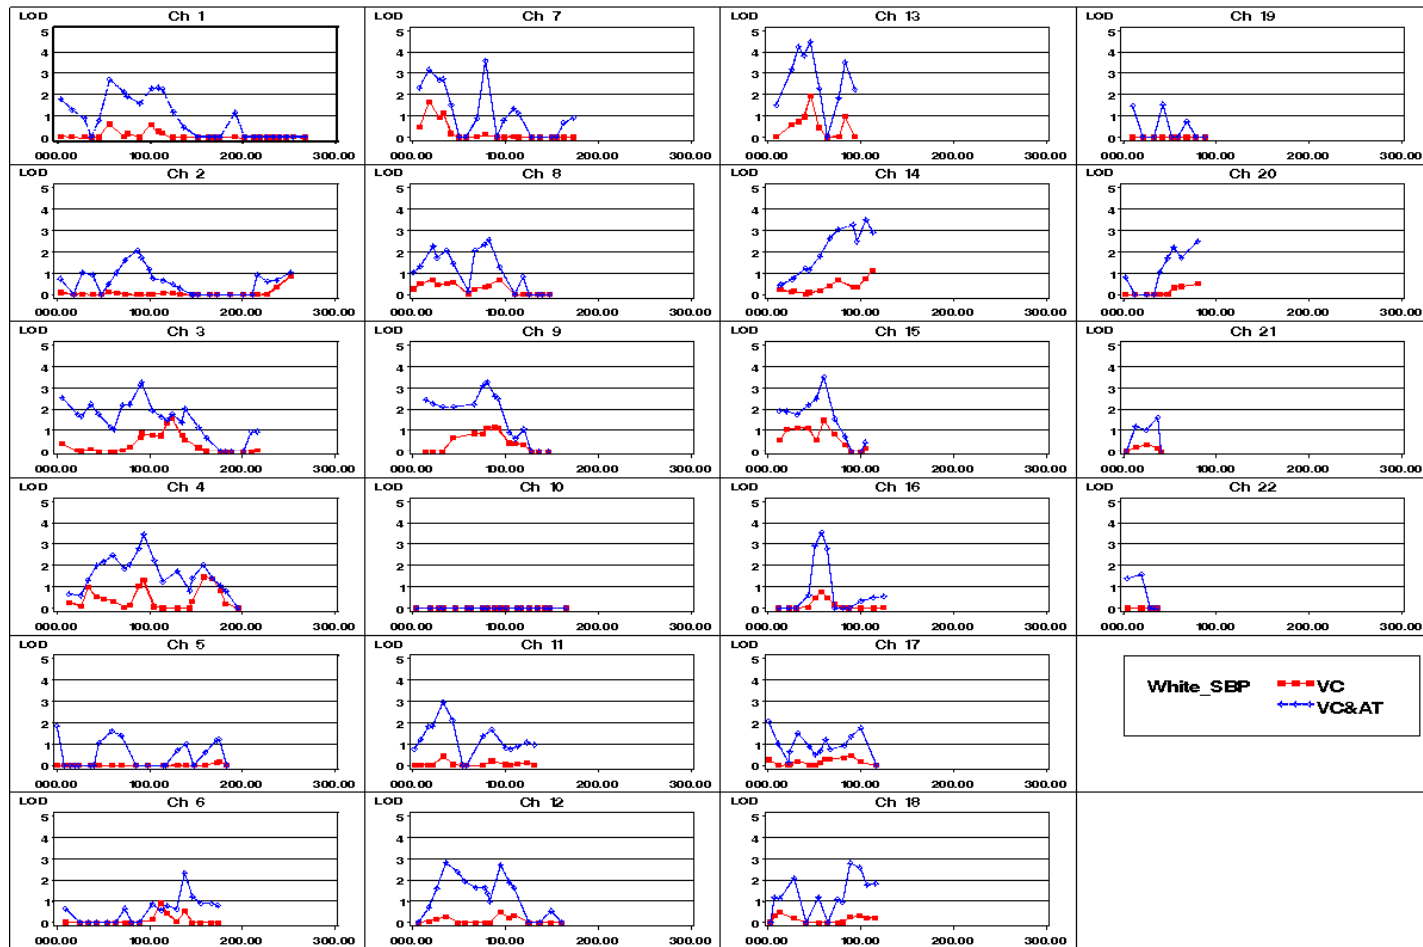

Figure S1. SBP genome-wide linkage results for Caucasians. VC: traditional variance component approach, VC&AT: variance component with age trends.

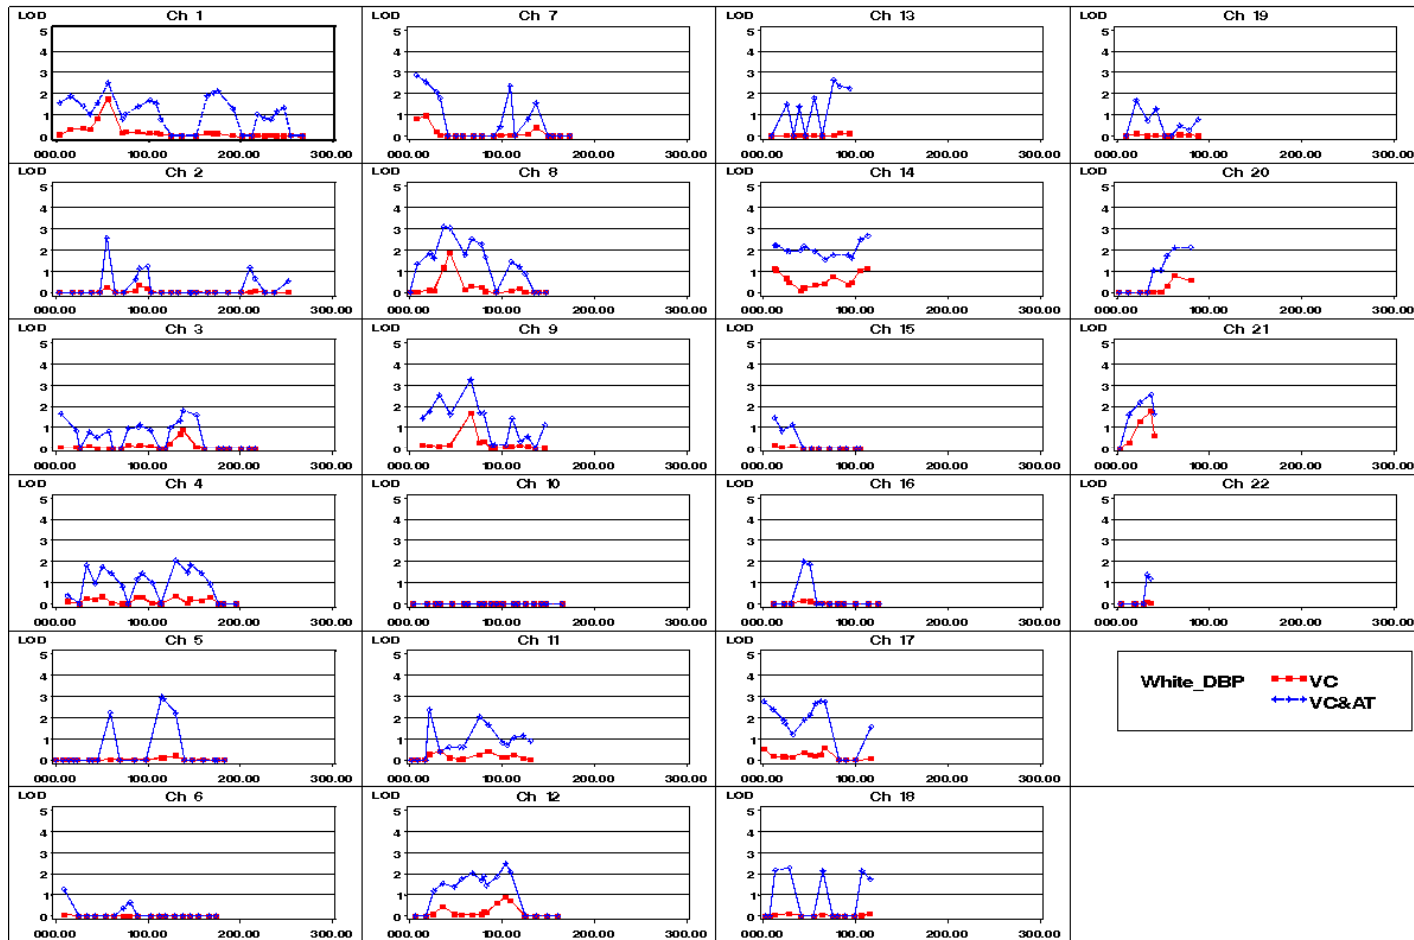

Figure S2. DBP genome-wide linkage results for Caucasians. VC: traditional variance component approach, VC&AT: variance component with age trends.

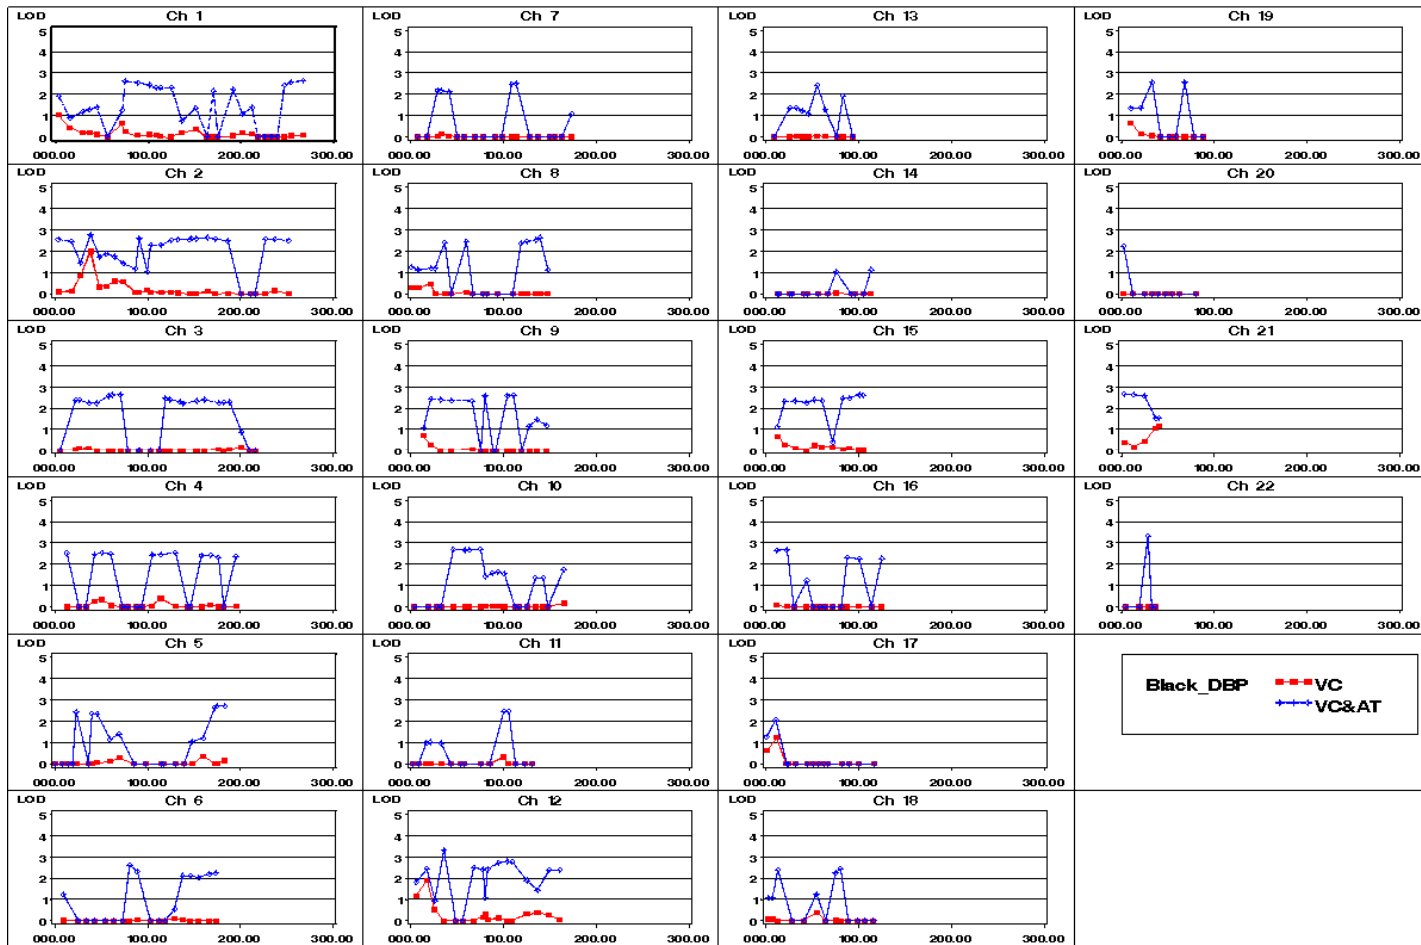

Figure S3. DBP genome-wide linkage results for African Americans. VC: traditional variance component approach, VC&AT: variance component with age trends.
